# Supplementary material for: ROCK inhibition promotes microtentacles that enhance reattachment of breast cancer cells
Source: PubMed Central journal article supplement (PMC4467435; doi:10.18632/oncotarget.3360), 2015-01-31
Supplement: oncotarget-06-6251-s001.pdf [file oncotarget-06-6251-s001.pdf]

# ROCK inhibition promotes microtentacles that enhance reattachment of breast cancer cells

## Supplementary Material

A

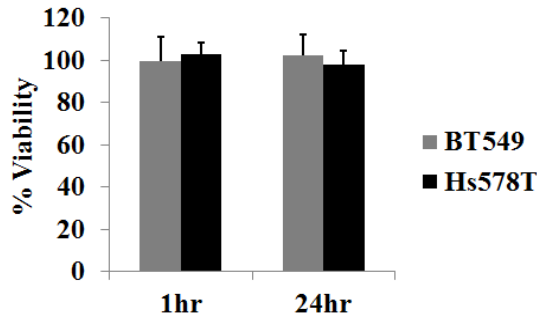

B

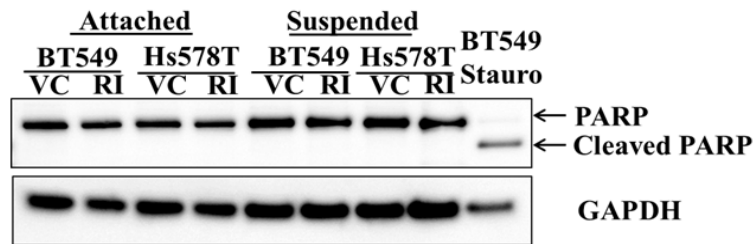

### Supplementary figure 1: Y-27632 treatment does not affect cell viability

A) Cell viability measured using a metabolic colorimetric assay; CellTiter (Promega) shows no decrease in viability on treatment of BT549 and Hs578T cells with 10 $\mu$ M Y-27632 for 1 hour or 24 hours. Columns represent averaged values of 3 independent experiments done in triplicate, normalized over vehicle-control B) Representative western blot image of attached and suspended BT549 and Hs578T cells treated with 10 $\mu$ M Y-27632 [RI] for 1 hour shows absence of PARP cleavage (N=3). BT549 cells treated with 0.5 $\mu$ M staurosporine for 1 hour was used as a positive control for PARP cleavage.

**A**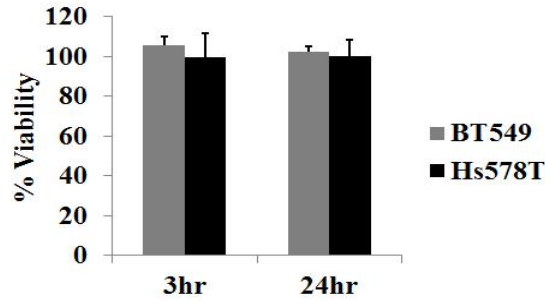**B**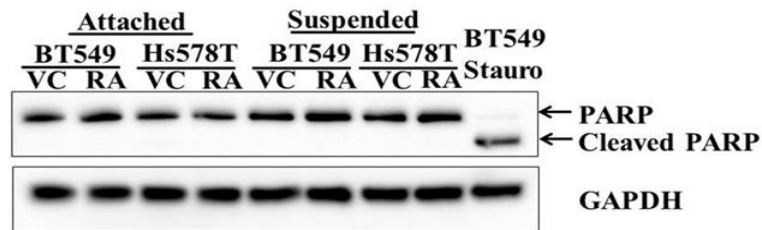

**Supplementary figure 2: Rho Activator II treatment does not affect cell viability**

A) Cell viability measured using a metabolic colorimetric assay; CellTiter (Promega) shows no decrease in viability of BT549 or Hs578T cells on treatment with 4 $\mu$ g/ml Rho Activator II for 3 hours or 24 hours. Columns represent averaged values of 3 independent experiments done in triplicate, normalized over vehicle-control. B) Representative western blot image of attached and suspended BT549 and Hs578T cells treated with 4 $\mu$ g/ml Rho Activator II [RA] for 3 hours shows absence of PARP cleavage (N=3). BT549 cells treated with 0.5 $\mu$ M staurosporine for 1 hour was used as a positive control for PARP cleavage.

**A**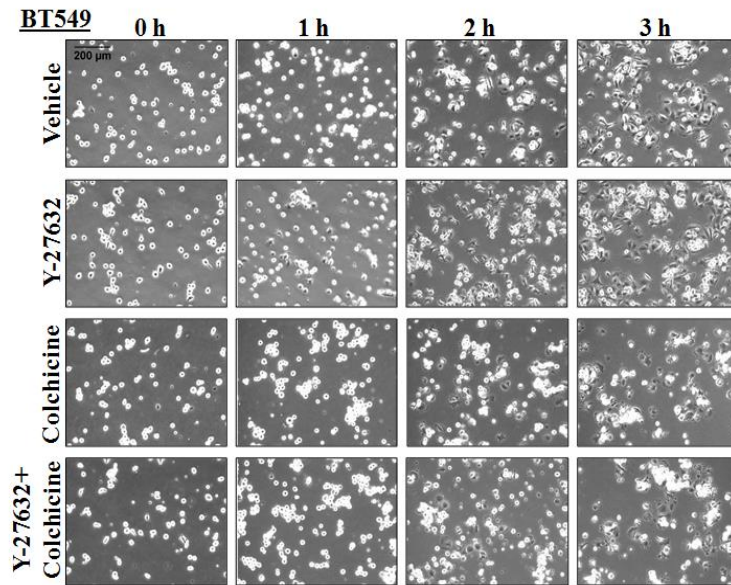**B**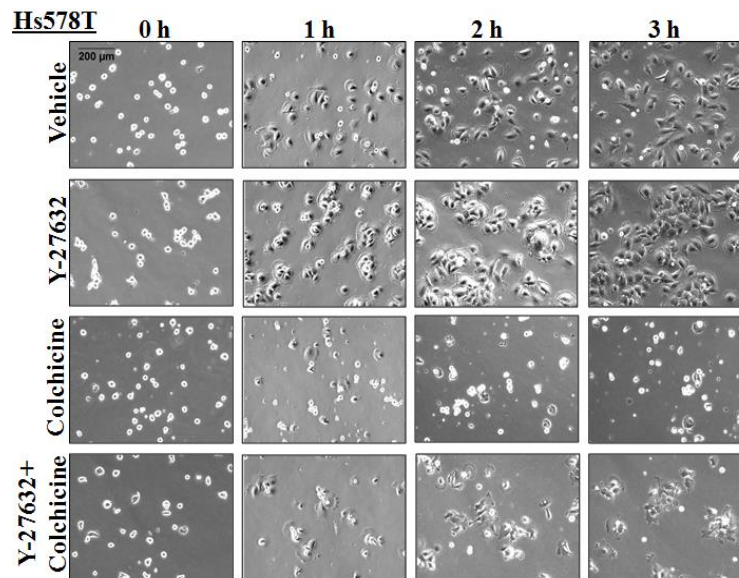

**Supplementary figure 3: Colchicine treatment reduces reattachment of cells from suspension**

Phase contrast images of A) BT549 and B) Hs578T cells treated for an hour with vehicle control or 10 $\mu$ M Y-27632 or 50 $\mu$ M colchicine or a combination of 10 $\mu$ M Y-27632 and 50 $\mu$ M colchicine show differences in reattachment efficiencies of cells from each treatment group following detachment. Cells treated with 10 $\mu$ M Y-27632 reattach more efficiently compared to vehicle-treated group. 50 $\mu$ M colchicine treatment significantly reduces the reattachment frequency of cells when used singly or in combination with Y-27632 (10x magnification).
